# Supplementary material for: Corrosion behavior and mechanism of ductile iron with different degrees of deterioration of cement mortar lining in reclaimed water pipelines
Source: Royal Society of Chemistry journal article supplement (doi:10.1039/d0ra08042j), 2020-01-01
Supplement: d0ra08042j1.pdf [file d0ra08042j1.pdf]

## Supporting information (SI)

### **Corrosion behavior and mechanism of ductile iron with different degrees of deterioration of cement mortar lining in reclaimed water pipelines**

Yunhui Liu<sup>a</sup>, Yimei Tian<sup>a</sup>, Rufang Zhang<sup>a</sup>, Hao Guo<sup>b</sup>, Weigao Zhao<sup>a</sup>, Jianjun Huang<sup>a</sup>

a. School of Environmental Science and Engineering, Tianjin University, Tianjin 300350, China.

b. The Institute of Seawater Desalination and Multipurpose Utilization, MNR (Tianjin), Tianjin 300192, China.

-----  
\* Corresponding author. E-mail: [hjj@tju.edu.cn](mailto:hjj@tju.edu.cn) (Jianjun Huang)

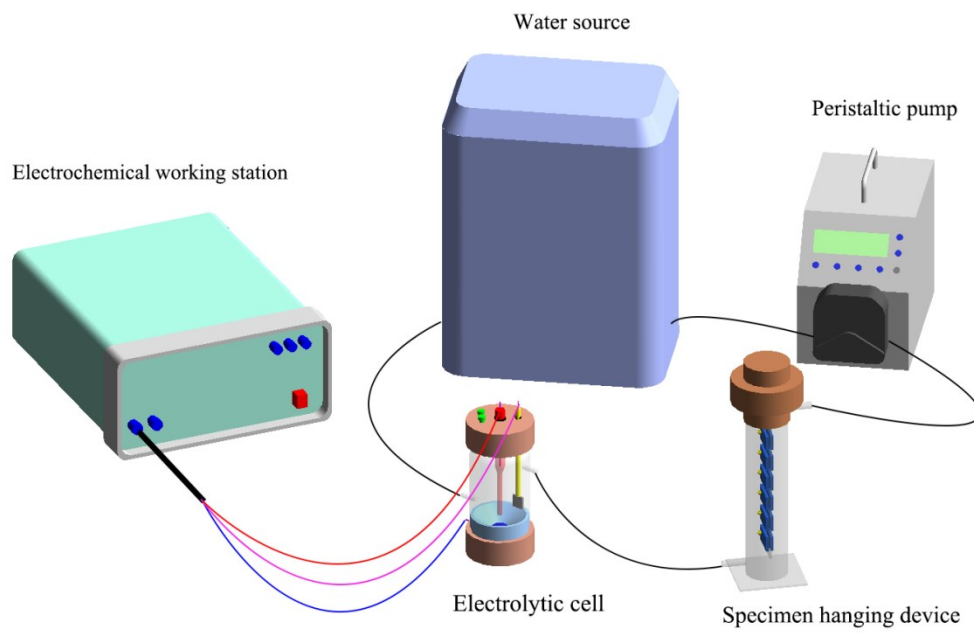

**Figure S1** Schematic diagram of dynamic corrosion system.

**Table S1** Corrosion current density and Tafel slopes of ductile iron with different cement mortar lining coverage.

| Specimens              | Time (d) | $\beta_a$ (mV) | $\beta_c$ (mV) | $I_{cor}$ (mA/cm <sup>2</sup> ) |
|------------------------|----------|----------------|----------------|---------------------------------|
| Lined<br>(100% lining) | 1        | 109.33         | 61.60          | 0.000486                        |
|                        | 5        | 110.46         | 61.25          | 0.000535                        |
|                        | 10       | 120.11         | 58.63          | 0.000518                        |
|                        | 15       | 102.56         | 63.98          | 0.000571                        |
|                        | 30       | 117.37         | 59.31          | 0.000556                        |
|                        | 45       | 133.84         | 55.84          | 0.000550                        |
|                        | 60       | 127.85         | 56.95          | 0.000560                        |
|                        | 75       | 110.29         | 61.30          | 0.000509                        |
| 90% lining             | 1        | 78.04          | 79.57          | 0.00256                         |
|                        | 5        | 75.84          | 82.00          | 0.00331                         |
|                        | 10       | 72.76          | 85.94          | 0.00291                         |
|                        | 15       | 83.60          | 74.52          | 0.00238                         |
|                        | 30       | 86.60          | 72.29          | 0.00177                         |
|                        | 45       | 87.18          | 71.89          | 0.00164                         |
|                        | 60       | 81.69          | 76.10          | 0.00163                         |
|                        | 75       | 83.43          | 74.65          | 0.00123                         |
| 50% lining             | 1        | 74.62          | 83.47          | 0.0108                          |
|                        | 5        | 63.60          | 103.54         | 0.0116                          |
|                        | 10       | 73.56          | 84.85          | 0.0125                          |
|                        | 15       | 74.91          | 83.12          | 0.0114                          |
|                        | 30       | 77.77          | 79.86          | 0.0082                          |
|                        | 45       | 78.14          | 79.47          | 0.0067                          |
|                        | 60       | 71.04          | 88.46          | 0.0065                          |
|                        | 75       | 71.19          | 88.23          | 0.0057                          |
| Unlined                | 1        | 79.61          | 78.00          | 0.0086                          |
|                        | 5        | 67.85          | 93.97          | 0.0078                          |

|    |       |       |        |
|----|-------|-------|--------|
| 10 | 74.22 | 83.98 | 0.0074 |
| 15 | 81.01 | 76.71 | 0.0070 |
| 30 | 80.71 | 76.97 | 0.0065 |
| 45 | 81.54 | 82.59 | 0.0062 |
| 60 | 82.32 | 80.85 | 0.0059 |
| 75 | 83.32 | 74.74 | 0.0056 |

**Table S2** OCP data of experiments.

| Time (d) | OCP (V)                |            |            |          |
|----------|------------------------|------------|------------|----------|
|          | Lined<br>(100% lining) | 90% lining | 50% lining | Unlined  |
| 1        | -0.62991               | -0.61664   | -0.64444   | -0.59929 |
| 5        | -0.65011               | -0.60138   | -0.65822   | -0.62645 |
| 10       | -0.65821               | -0.60946   | -0.64111   | -0.61118 |
| 15       | -0.65541               | -0.57165   | -0.62472   | -0.60076 |
| 30       | -0.66349               | -0.56768   | -0.63020   | -0.57032 |
| 45       | -0.68390               | -0.51988   | -0.62859   | -0.65040 |
| 60       | -0.68997               | -0.59456   | -0.64558   | -0.59652 |
| 75       | -0.67554               | -0.58242   | -0.64508   | -0.52155 |

**Table S3** ECM results of lined ductile iron.

| Time<br>(d) | $R_s$<br>( $\Omega \cdot \text{cm}^2$ ) | $R_{ct}$<br>( $\Omega \cdot \text{cm}^2$ ) | $CPE_{ct}$<br>( $\text{S} \cdot \text{sec}^n / \text{cm}^2$ ) | $n_{ct}$ | $R_c$<br>( $\Omega \cdot \text{cm}^2$ ) | $CPE_c$<br>( $\text{S} \cdot \text{sec}^n / \text{cm}^2$ ) | $n_c$ |
|-------------|-----------------------------------------|--------------------------------------------|---------------------------------------------------------------|----------|-----------------------------------------|------------------------------------------------------------|-------|
| 1 d         | 0.0007                                  | 7897                                       | $1.14 \times 10^{-8}$                                         | 0.768    | 39540                                   | $3.62 \times 10^{-4}$                                      | 0.676 |
| 5 d         | 0.0020                                  | 7834                                       | $5.16 \times 10^{-9}$                                         | 0.825    | 47009                                   | $4.41 \times 10^{-4}$                                      | 0.712 |
| 10 d        | 0.0006                                  | 8193                                       | $6.27 \times 10^{-9}$                                         | 0.789    | 51702                                   | $4.16 \times 10^{-4}$                                      | 0.723 |
| 15 d        | 0.0013                                  | 6687                                       | $6.14 \times 10^{-9}$                                         | 0.870    | 54443                                   | $5.32 \times 10^{-4}$                                      | 0.704 |
| 30 d        | 0.0008                                  | 8339                                       | $4.83 \times 10^{-9}$                                         | 0.835    | 58781                                   | $5.81 \times 10^{-4}$                                      | 0.722 |
| 45 d        | 0.0006                                  | 8803                                       | $1.59 \times 10^{-8}$                                         | 0.703    | 80543                                   | $6.37 \times 10^{-4}$                                      | 0.725 |
| 60 d        | 0.0024                                  | 10310                                      | $5.02 \times 10^{-9}$                                         | 0.853    | 104509                                  | $6.77 \times 10^{-4}$                                      | 0.715 |
| 75 d        | 0.0002                                  | 13120                                      | $3.07 \times 10^{-9}$                                         | 0.873    | 145620                                  | $7.08 \times 10^{-4}$                                      | 0.717 |

**Table S4** ECM results of ductile iron with 90% lining coverage.

| Time<br>(d) | $R_s$<br>( $\Omega \cdot \text{cm}^2$ ) | $R_{ct}$<br>( $\Omega \cdot \text{cm}^2$ ) | $CPE_{ct}$<br>( $\text{S} \cdot \text{sec}^n / \text{cm}^2$ ) | $n_{ct}$ | $R_{f+c}$<br>( $\Omega \cdot \text{cm}^2$ ) | $CPE_{f+c}$<br>( $\text{S} \cdot \text{sec}^n / \text{cm}^2$ ) | $n_2$ | /                                       | /                                                          | /     |
|-------------|-----------------------------------------|--------------------------------------------|---------------------------------------------------------------|----------|---------------------------------------------|----------------------------------------------------------------|-------|-----------------------------------------|------------------------------------------------------------|-------|
| 1 d         | 444.3                                   | 1812                                       | $4.34 \times 10^{-9}$                                         | 0.994    | 4199                                        | $3.84 \times 10^{-4}$                                          | 0.403 | /                                       | /                                                          | /     |
| 5 d         | 369.9                                   | 1902                                       | $3.91 \times 10^{-8}$                                         | 0.809    | 3940                                        | $6.41 \times 10^{-4}$                                          | 0.505 | /                                       | /                                                          | /     |
| 10 d        | 23.11                                   | 1862                                       | $1.07 \times 10^{-8}$                                         | 0.763    | 4733                                        | $6.73 \times 10^{-4}$                                          | 0.413 | /                                       | /                                                          | /     |
| Time<br>(d) | $R_s$<br>( $\Omega \cdot \text{cm}^2$ ) | $R_{ct}$<br>( $\Omega \cdot \text{cm}^2$ ) | $CPE_{ct}$<br>( $\text{S} \cdot \text{sec}^n / \text{cm}^2$ ) | $n_{ct}$ | $R_f$<br>( $\Omega \cdot \text{cm}^2$ )     | $CPE_f$<br>( $\text{S} \cdot \text{sec}^n / \text{cm}^2$ )     | $n_f$ | $R_c$<br>( $\Omega \cdot \text{cm}^2$ ) | $CPE_c$<br>( $\text{S} \cdot \text{sec}^n / \text{cm}^2$ ) | $n_c$ |
| 15 d        | 83.66                                   | 1889                                       | $6.40 \times 10^{-9}$                                         | 0.858    | 2005                                        | $8.12 \times 10^{-5}$                                          | 0.512 | 4121                                    | $1.07 \times 10^{-3}$                                      | 0.713 |
| 30 d        | 279.6                                   | 1998                                       | $5.35 \times 10^{-9}$                                         | 0.912    | 2513                                        | $8.67 \times 10^{-5}$                                          | 0.438 | 6231                                    | $9.84 \times 10^{-5}$                                      | 0.703 |
| 45 d        | 249.6                                   | 2091                                       | $5.81 \times 10^{-9}$                                         | 0.899    | 2991                                        | $7.71 \times 10^{-5}$                                          | 0.438 | 8068                                    | $9.48 \times 10^{-4}$                                      | 0.711 |
| 60 d        | 312.6                                   | 2226                                       | $4.07 \times 10^{-9}$                                         | 0.937    | 6536                                        | $4.58 \times 10^{-4}$                                          | 0.510 | 16418                                   | $2.05 \times 10^{-4}$                                      | 0.455 |
| 75 d        | 62.19                                   | 3038                                       | $4.41 \times 10^{-9}$                                         | 0.882    | 8265                                        | $3.93 \times 10^{-5}$                                          | 0.523 | 25221                                   | $2.38 \times 10^{-4}$                                      | 0.413 |

**Table S5** ECM results of ductile iron with 50% lining coverage.

| Time<br>(d) | $R_s$<br>( $\Omega \cdot \text{cm}^2$ ) | $R_{ct}$<br>( $\Omega \cdot \text{cm}^2$ ) | $CPE_{ct}$<br>( $\text{S} \cdot \text{sec}^n / \text{cm}^2$ ) | $n_{ct}$ | $R_{f+c}$<br>( $\Omega \cdot \text{cm}^2$ ) | $CPE_{f+c}$<br>( $\text{S} \cdot \text{sec}^n / \text{cm}^2$ ) | $n_{f+c}$ |
|-------------|-----------------------------------------|--------------------------------------------|---------------------------------------------------------------|----------|---------------------------------------------|----------------------------------------------------------------|-----------|
| 1 d         | 54.26                                   | 1216                                       | $3.55 \times 10^{-8}$                                         | 0.857    | 416.0                                       | 0.001302                                                       | 0.891     |
| 5 d         | 42.10                                   | 1018                                       | $3.28 \times 10^{-8}$                                         | 0.810    | 601.6                                       | 0.001623                                                       | 0.869     |
| 10 d        | 43.19                                   | 1032                                       | $2.82 \times 10^{-8}$                                         | 0.812    | 450.7                                       | 0.001772                                                       | 0.863     |
| 15 d        | 48.14                                   | 1099                                       | $2.36 \times 10^{-8}$                                         | 0.813    | 551.9                                       | 0.001470                                                       | 0.605     |
| 30 d        | 49.03                                   | 1186                                       | $2.01 \times 10^{-8}$                                         | 0.818    | 2032.0                                      | 0.000983                                                       | 0.310     |
| 45 d        | 51.05                                   | 1175                                       | $2.31 \times 10^{-8}$                                         | 0.821    | 2131.0                                      | 0.000868                                                       | 0.333     |
| 60 d        | 63.34                                   | 1171                                       | $2.52 \times 10^{-8}$                                         | 0.856    | 2177.0                                      | 0.000896                                                       | 0.392     |
| 75 d        | 82.51                                   | 1191                                       | $2.11 \times 10^{-8}$                                         | 0.855    | 2282.0                                      | 0.000885                                                       | 0.406     |

**Table S6** ECM results of unlined ductile iron.

| Time<br>(d) | $R_s$<br>( $\Omega \cdot \text{cm}^2$ ) | $R_{ct}$<br>( $\Omega \cdot \text{cm}^2$ ) | $CPE_{ct}$<br>( $\text{S} \cdot \text{sec}^n / \text{cm}^2$ ) | $n_{ct}$ | $R_f$<br>( $\Omega \cdot \text{cm}^2$ ) | $CPE_f$<br>( $\text{S} \cdot \text{sec}^n / \text{cm}^2$ ) | $n_f$ |
|-------------|-----------------------------------------|--------------------------------------------|---------------------------------------------------------------|----------|-----------------------------------------|------------------------------------------------------------|-------|
| 1 d         | 62.1                                    | 922.4                                      | $2.29 \times 10^{-8}$                                         | 0.897    | 972                                     | 0.001324                                                   | 0.478 |
| 5 d         | 53.4                                    | 913.6                                      | $3.15 \times 10^{-8}$                                         | 0.772    | 1373                                    | 0.001111                                                   | 0.551 |
| 10 d        | 57.4                                    | 921.0                                      | $2.76 \times 10^{-8}$                                         | 0.788    | 1569                                    | 0.001064                                                   | 0.484 |
| 15 d        | 66.6                                    | 934.1                                      | $2.53 \times 10^{-8}$                                         | 0.793    | 1526                                    | 0.000996                                                   | 0.491 |
| 30 d        | 67.5                                    | 949.0                                      | $2.73 \times 10^{-8}$                                         | 0.811    | 2235                                    | 0.001034                                                   | 0.443 |
| 45 d        | 75.7                                    | 1026.1                                     | $2.90 \times 10^{-8}$                                         | 0.804    | 1494                                    | 0.000867                                                   | 0.489 |
| 60 d        | 81.7                                    | 1010.5                                     | $2.46 \times 10^{-8}$                                         | 0.840    | 1621                                    | 0.001006                                                   | 0.458 |
| 75 d        | 83.8                                    | 1021.2                                     | $1.79 \times 10^{-8}$                                         | 0.857    | 1571                                    | 0.001075                                                   | 0.416 |

**Table S7** Polarization resistance ( $R_p$ ) measured by polarization curve and EIS at different corrosion time.

| Time (d) | $R_p$ ( $\Omega \cdot \text{cm}^2$ ) - Polarization data |            |            |         | $R_p$ ( $\Omega \cdot \text{cm}^2$ ) - Impedance data |            |            |         |
|----------|----------------------------------------------------------|------------|------------|---------|-------------------------------------------------------|------------|------------|---------|
|          | Lined (100% lining)                                      | 90% lining | 50% lining | Unlined | Lined (100% lining)                                   | 90% lining | 50% lining | Unlined |
| 1 d      | 34587                                                    | 6850.3     | 1538.5     | 2011.7  | 47437                                                 | 6111.0     | 1632.0     | 1894.4  |
| 5 d      | 32610                                                    | 5408.1     | 1524.8     | 2296.6  | 54843                                                 | 5392.0     | 1619.6     | 2286.6  |
| 10 d     | 33300                                                    | 6129.6     | 1352.3     | 2376.2  | 59895                                                 | 6239.0     | 1482.7     | 2490.0  |
| 15 d     | 30421                                                    | 7206.5     | 1476.9     | 2404.7  | 58383                                                 | 8015.0     | 1650.9     | 2460.1  |
| 30 d     | 28794                                                    | 9738.4     | 2154.1     | 2635.6  | 60772                                                 | 10760      | 3218.0     | 3184.0  |
| 45 d     | 31376                                                    | 10715      | 2599.2     | 2886.1  | 63421                                                 | 13150      | 3306.0     | 2520.1  |
| 60 d     | 30988                                                    | 10609      | 2747.6     | 2980.1  | 94819                                                 | 25180      | 3348.0     | 2631.5  |
| 75 d     | 34612                                                    | 14206      | 3196.1     | 3725.4  | 100021                                                | 36524      | 3473.0     | 2592.2  |
